# Supplementary material for: Use of Mobile Phone Text Message Reminders in Health Care Services: A Narrative Literature Review
Source: PubMed Central journal article supplement (PMC4211035; doi:10.2196/jmir.3442), 2014-10-17
Supplement: jmir_v16i10e222_app2.pdf [file jmir_v16i10e222_app2.pdf]

| <b>Author (year)</b>                   | <b>Population Sample size (response rate %)</b> | <b>Description of the intervention</b>                                                                                                                                              | <b>Goal of the text message</b> | <b>Dose</b>                                            | <b>Timing</b>                                    |
|----------------------------------------|-------------------------------------------------|-------------------------------------------------------------------------------------------------------------------------------------------------------------------------------------|---------------------------------|--------------------------------------------------------|--------------------------------------------------|
| <b>Anhøj &amp; Møldrup (2004) [39]</b> | 15<br>12<br>(80%)                               | Automated SMS messages: including a medication reminder, and 3 diary questions                                                                                                      | Medication reminder             | 4 SMS messages daily                                   | At a participant's self-selected time of the day |
| <b>Agyapong et al (2013) [38]</b>      | 26<br>24<br>(92%)                               | Supportive text messages, eg promoting adherence with medication and abstinence from alcohol                                                                                        | Supportive text message         | Twice daily                                            | At 10.00 and 19.00                               |
| <b>Altuwaijri et al (2012) [72]</b>    | N/a<br>Total not described<br>N/a               | Automated SMS messages                                                                                                                                                              | Appointment reminder            | 1 text message                                         | 5 days and a day prior to the appointment date   |
| <b>Arora et al. (2012) [32]</b>        | 23<br>23<br>(100%)                              | Automated text messages from 5 categories: 1) educational and motivational, 2) medication reminders (3 times per week), 3) healthy living challenges, 4) trivia, and 5) phone links | Medication reminder             | 2 SMS messages per day or one SMS message 1-3 per week | At 9 a.m., 12 p.m., and 6 p.m.                   |
| <b>Balato et al (2012) [37]</b>        | 40<br>40<br>(100%)                              | Manually sent text messages                                                                                                                                                         | Treatment reminder              | Reminders 3 times weekly: 1 text message per day       | Not described                                    |
| <b>Boker et al (2012) [47]</b>         | 40<br>33<br>(83%)                               | Automated and customized text messages reminding about their medication                                                                                                             | Medication reminder             | Twice daily                                            | In the morning and evening                       |
| <b>Bos et al (2005) [58]</b>           | 343<br>301<br>(88%)                             | A reminder either by telephone, mail or SMS                                                                                                                                         | Appointment reminder            | 1 text message                                         | A day before the appointment                     |
| <b>Bourne et al (2011) [69]</b>        | N/a<br>3551<br>N/a                              | A SMS reminder template added to the patient electronic database                                                                                                                    | Appointment reminder            | 1 text message                                         | Not described                                    |

|                                   |                                  |                                                                                                                             |                                      |                                                                               |                                                                               |
|-----------------------------------|----------------------------------|-----------------------------------------------------------------------------------------------------------------------------|--------------------------------------|-------------------------------------------------------------------------------|-------------------------------------------------------------------------------|
| <b>Brannan et al (2011) [56]</b>  | N/a<br>201<br>N/a                | A customized text message reminder                                                                                          | Appointment reminder                 | 1 text message                                                                | Two weeks before the scheduled appointment                                    |
| <b>Branson et al (2011) [70]</b>  | 48<br>48<br>(100%)               | Manually sent text message reminder                                                                                         | Appointment reminder                 | 1 text message                                                                | The evening before each scheduled appointment                                 |
| <b>Britto et al (2011) [85]</b>   | 23<br>19<br>(83%)                | Web-based calendar-to-text system for appointment and medication reminders: patients were able to create their own messages | Appointment and medication reminders | Participants were able to determine how often the messages were sent          | At a participant's self-selected time of the day                              |
| <b>Chen et al (2008) [61]</b>     | 1859<br>1848<br>(99%)            | SMS or telephone call reminder                                                                                              | Appointment reminder                 | 1 text message                                                                | 72 h prior to the appointment                                                 |
| <b>da Costa et al (2010) [67]</b> | N/a<br>32709 <sup>a</sup><br>N/a | Automated SMS text message                                                                                                  | Appointment reminder                 | 1 text message                                                                | 24h before the appointment                                                    |
| <b>da Costa et al (2012) [80]</b> | 29<br>21<br>(72%)                | Automated SMS message                                                                                                       | Medication reminder                  | On Saturdays and Sundays and during the working week on alternate days        | 30 min before the required time of the last required medication dose in a day |
| <b>Dick et al (2011) [44]</b>     | 19<br>18<br>(95%)                | Automated text messages                                                                                                     | Treatment adherence                  | Daily (medication or blood sugar reminder), weekly (question about foot care) | Not described                                                                 |
| <b>Downer et al (2005) [59]</b>   | N/a<br>2864<br>N/a               | Automated SMS reminder                                                                                                      | Appointment reminder                 | 1 text message                                                                | 3 working days before the appointment date                                    |
| <b>Downing et al (2013) [77]</b>  | 94<br>76<br>(81%)                | Manually sent SMS reminders                                                                                                 | Appointment reminder                 | 1 text message                                                                | On Mondays                                                                    |
| <b>Dowshen et al (2012) [48]</b>  | 25<br>21<br>(84%)                | Automated, personalized SMS reminder messages                                                                               | Medication reminder                  | Daily                                                                         | At the time(s) specified by patient                                           |

|                                           |                      |                                                                                                                          |                                      |                                                                      |                                                                                                                           |
|-------------------------------------------|----------------------|--------------------------------------------------------------------------------------------------------------------------|--------------------------------------|----------------------------------------------------------------------|---------------------------------------------------------------------------------------------------------------------------|
| <b>Fairhurst &amp; Sheikh (2008) [62]</b> | N/a<br>172<br>N/a    | Text message reminder of the appointment                                                                                 | Appointment reminder                 | 1 text message                                                       | 08:00-09:00 a.m. or 04:00-05:00 p.m.                                                                                      |
| <b>Fischer et al (2012) [73]</b>          | N/a<br>47<br>N/a     | Automated text message prompts about blood sugar readings and appointment reminder messages                              | Appointment reminder                 | 3 times a week (blood sugar) and 3 times advance each appointment    | At 7:15 a.m. on Mondays, Wednesdays and Fridays (blood sugar) and at 7, 3 and 1 day(s) prior to the scheduled appointment |
| <b>Foley &amp; O'Neill (2009) [64]</b>    | N/a<br>709<br>N/a    | Automated SMS reminders                                                                                                  | Appointment reminder                 | 1 text message                                                       | 24 h prior to their appointment                                                                                           |
| <b>Foreman et al (2012) [82]</b>          | 580<br>580<br>(100%) | Text message reminders about medication (6 categories)                                                                   | Medication reminder                  | Varies according to the patients                                     | Any hour of the day                                                                                                       |
| <b>Franklin et al (2006) [35]</b>         | 92<br>90<br>(98%)    | Automated delivery of a series of appropriately tailored messages, including a weekly reminder of the goal set in clinic | Treatment reminder                   | Daily (tips) or weekly (reminder)                                    | Not described                                                                                                             |
| <b>Furberg et al (2012) [21]</b>          | 52<br>46<br>(88%)    | SMS reminders and supportive messages to enhance outcomes related to managing HIV                                        | Appointment and medication reminders | Appointment: within 3 days prior to appointment<br>Medication: daily | Appointment: randomly selected<br>Medication: according to participants clinical dosing time                              |
| <b>Granholtm et al (2012) [49]</b>        | 55<br>42<br>(76%)    | Text messages focusing on 3 intervention domains: medication adherence, socialization and auditory hallucinations        | Medication reminder                  | 3 sets of 4 text messages (12 total) daily                           | In the morning, afternoon and evening                                                                                     |
| <b>Greaney et al (2012) [86]</b>          | N/a<br>598<br>N/a    | Automated electronic reminders (SMS or automated voice response messages) with participants selecting modality           | Supportive text messages             | 1 text message                                                       | Every other week                                                                                                          |
| <b>Guy et al (2013) [78]</b>              | N/a<br>681<br>N/a    | Automated text message reminders                                                                                         | Appointment reminder                 | 1 text message                                                       | On the prespecified date set                                                                                              |

|                                        |                     |                                                                                  |                               |                                                                                   |                                                                |
|----------------------------------------|---------------------|----------------------------------------------------------------------------------|-------------------------------|-----------------------------------------------------------------------------------|----------------------------------------------------------------|
| <b>Hanauer et al (2009) [36]</b>       | 40<br>29<br>(73%)   | Automated reminders either via cell phone text messaging or by e-mail            | Treatment monitoring reminder | The number of reminders were determined by the participants                       | The frequency of reminders were determined by the participants |
| <b>Hardy et al (2011) [45]</b>         | 23<br>19<br>(83%)   | Automated, personalized text messages                                            | Medication reminder           | Daily                                                                             | Matching the ART dosing frequency                              |
| <b>Holtz &amp; Whitten (2009) [84]</b> | N/a<br>4<br>N/a     | Automated text message reminder, if the patient did not sent a peak flow reading | Treatment adherence           | 1 text message                                                                    | At 11 a.m.                                                     |
| <b>Hou et al. (2010) [42]</b>          | 82<br>73<br>(89%)   | Automated text message reminders                                                 | Medication reminder           | Daily                                                                             | At a designated time chosen by the participant                 |
| <b>Kollman et al (2007) [79]</b>       | 10<br>10<br>(100%)  | Mobile phone-based diabetes management system, including text message reminders  | Treatment adherence           | SMS was sent if less than 3 blood glucose measurements had been received that day | In the evening                                                 |
| <b>Koshy et al (2008) [63]</b>         | N/a<br>9959<br>N/a  | Automated SMS reminder                                                           | Appointment reminder          | 1 text message                                                                    | One day or four days before the appointment                    |
| <b>Leong et al (2006) [60]</b>         | 993<br>964<br>(97%) | Text message and mobile phone call reminders                                     | Appointment reminder          | 1 reminder                                                                        | 24-48 hours prior to the scheduled appointment                 |
| <b>Lewis et al (2013) [53]</b>         | 52<br>46<br>(88%)   | Automated, tailored text message                                                 | Medication reminder           | 1-3 times per day                                                                 | Based on the participants' own ART medication regimen          |
| <b>Liew et al (2009) [65]</b>          | 931<br>769<br>(83%) | Reminders via text messaging or telephone call                                   | Appointment reminder          | 1 reminder                                                                        | 24-48 hours prior to the appointment                           |

|                                 |                                   |                                                                                                                                                                          |                                      |                                                                                                                                   |                                                  |
|---------------------------------|-----------------------------------|--------------------------------------------------------------------------------------------------------------------------------------------------------------------------|--------------------------------------|-----------------------------------------------------------------------------------------------------------------------------------|--------------------------------------------------|
| <b>Lua et al (2012) [33]</b>    | 51<br>51<br>(100%)                | SMS-based educational system sending text messages to patients' mobile telephone including educational messages, drug-taking reminders and clinic reminders              | Appointment and medication reminders | Drug-taking reminder once a month, appointment reminder a day before the appointment                                              | At 10:00 a.m.                                    |
| <b>Ludlow et al (2009) [66]</b> | 126<br>126<br>(100%)              | A reminder via email, text messaging or telephone call (control group)                                                                                                   | Treatment monitoring reminder        | The week before the blood test was due, the week the test was due and the following week, if no blood test results were available | On Monday morning                                |
| <b>Lund et al (2012) [34]</b>   | 2637<br>2550<br>(97%)             | An automated SMS system providing (educational messages and appointment reminder) and mobile phone voucher component throughout the pregnancy and 6 weeks after delivery | Appointment reminder                 | At the beginning two messages a month, after gestational week 36 twice a week                                                     | Not described                                    |
| <b>Lv et al (2012) [50]</b>     | 150<br>71<br>(47%)                | SMS reminders about how to manage asthma                                                                                                                                 | Appointment and medication reminders | Twice a day                                                                                                                       | At 10:00 a.m. and 8:00 p.m.                      |
| <b>Mao et al (2008) [55]</b>    | 100<br>100<br>(100%)              | Automated text message reminders about medication                                                                                                                        | Medication reminder                  | 1 text message                                                                                                                    | 10 min before the medication was due to be taken |
| <b>Milne (2010) [68]</b>        | N/a<br>112194 <sup>a</sup><br>N/a | SMS and email last minute reminders                                                                                                                                      | Appointment reminder                 | 1 reminder                                                                                                                        | 2 days in advance of the appointment             |
| <b>Montes et al (2012) [51]</b> | 254<br>251<br>(99%)               | SMS reminders to take medication                                                                                                                                         | Medication reminder                  | 1 message daily                                                                                                                   | At 11 a.m. or 2 p.m.                             |
| <b>Nundy et al (2013) [54]</b>  | 19<br>18<br>(95%)                 | Automated text messages                                                                                                                                                  | Appointment and medication reminders | Daily, semiweekly or weekly                                                                                                       | Not described                                    |
| <b>Nundy et al (2013) [20]</b>  | 27<br>6<br>(22%)                  | Automated SMS self-care reminders and educational messages                                                                                                               | Appointment and medication reminders | Appointment: 48 hours before and the day of the appointment<br>Medication: daily                                                  | Not described                                    |

|                                         |                     |                                                                                                                                                 |                                               |                                                                                                         |                                                                   |
|-----------------------------------------|---------------------|-------------------------------------------------------------------------------------------------------------------------------------------------|-----------------------------------------------|---------------------------------------------------------------------------------------------------------|-------------------------------------------------------------------|
| <b>Pena-Robichaux et al (2010) [31]</b> | 27<br>25<br>(93%)   | Automated text messages                                                                                                                         | Treatment reminders and educational messages  | 1 message daily: treatment reminders 3 times a week and educational information messages 4 times a week | 7-9 a.m. or 4-6 p.m.                                              |
| <b>Perry (2011) [71]</b>                | N/a<br>447<br>N/a   | Automatic SMS appointment reminders                                                                                                             | Appointment reminder                          | The day before the appointment                                                                          | Not described                                                     |
| <b>Pijnenborg et al (2007) [30]</b>     | 8<br>5<br>(63%)     | SMS text messages were used as prompts to remind participants of their daily activities and appointments                                        | Appointment and medication reminders          | According to the developed reminding schedule                                                           | According to the developed reminding schedule                     |
| <b>Pijnenborg et al (2010) [83]</b>     | 62<br>47<br>(76%)   | Web-based SMS text messages to improve patients everyday functioning                                                                            | Functioning reminders                         | Two SMS text message prompts for each goal                                                              | An hour and 10 min before the goal should take place              |
| <b>Pop-Eleches et al (2011) [46]</b>    | 431<br>428<br>(99%) | Automated text message reminders (short and long messages)                                                                                      | Medication reminder                           | Daily or weekly                                                                                         | At 12 p.m.                                                        |
| <b>Prasad &amp; Anand (2012) [74]</b>   | N/a<br>206<br>N/a   | SMS reminder                                                                                                                                    | Appointment reminder                          | 1 reminder                                                                                              | 24 h prior to the appointment and also the day of the appointment |
| <b>Rodrigues et al (2012) [40]</b>      | 150<br>141<br>(94%) | Mobile phone reminders: an interactive voice response (IVR) call + a non interactive neutral picture delivered as a short message service (SMS) | Medication reminder                           | Both components once a week on separate days of the week                                                | Time chosen by the participant                                    |
| <b>Shaw et al (2013) [22]</b>           | 16<br>14<br>(88%)   | Text messaging application for sustaining recent weight loss                                                                                    | Preventive and promotive messages (reminders) | Daily                                                                                                   | At 9 a.m.                                                         |
| <b>Sidney et al (2012) [41]</b>         | 150<br>139<br>(93%) | Mobile phone reminders: an interactive voice response (IVR) call + a non interactive neutral picture delivered as a short message service (SMS) | Medication reminder                           | Once a week (SMS 3 days after the call)                                                                 | At pre-arranged time                                              |

|                                        |                     |                                                          |                                      |                                                                                                       |                                                                                     |
|----------------------------------------|---------------------|----------------------------------------------------------|--------------------------------------|-------------------------------------------------------------------------------------------------------|-------------------------------------------------------------------------------------|
| <b>Sims et al (2012) [75]</b>          | N/a<br>1256<br>N/a  | Automated SMS reminders                                  | Appointment reminder                 | 7 and 5 or 7 and 3 days before the appointment                                                        | At 6 p.m.                                                                           |
| <b>Strandbygaard et al (2010) [43]</b> | 26<br>22<br>(85%)   | SMS reminders to take medication                         | Treatment adherence                  | 1 message daily                                                                                       | At 10 a.m.                                                                          |
| <b>Taylor et al (2012) [76]</b>        | 679<br>675<br>(99%) | SMS reminders (automated or manual)                      | Appointment reminder                 | 2 days (or the day) before the appointment                                                            | Not described                                                                       |
| <b>Ting et al (2012) [52]</b>          | 79<br>70<br>(89%)   | Automated text message reminders                         | Appointment and medication reminders | 7, 3 and 1 day(s) before the appointment and daily medication adherence reminders once or twice a day | At a set time of the day according to medication intake                             |
| <b>Vervloet et al (2012) [81]</b>      | 119<br>104<br>(87%) | SMS reminders sent by an electronic medication dispenser | Medication reminder                  | 1 text message                                                                                        | If patients had not opened their medication dispenser within the agreed time period |
| <b>Vilella et al (2004) [57]</b>       | N/a<br>4589<br>N/a  | Automated SMS reminders                                  | Vaccine reminder                     | Few days before the date foreseen the next vaccination dose                                           | Not described                                                                       |

Sample<sup>a</sup>=appointment

N/a=Not available
