# Supplementary material for: Use of Mobile Phone Text Message Reminders in Health Care Services: A Narrative Literature Review
Source: PubMed Central journal article supplement (PMC4211035; doi:10.2196/jmir.3442), 2014-10-17
Supplement: jmir_v16i10e222_app3.pdf [file jmir_v16i10e222_app3.pdf]

| <b>Author (year)</b>                   | <b>Outcome measure</b>               | <b>Instruments</b>                                                                                                                                                  | <b>Outcomes</b> |
|----------------------------------------|--------------------------------------|---------------------------------------------------------------------------------------------------------------------------------------------------------------------|-----------------|
| <b>Anhøj &amp; Møldrup (2004) [39]</b> | Patient compliance with an SMS diary | Response rate for requested diary data                                                                                                                              | ↑               |
| <b>Altuwaijri et al (2012) [72]</b>    | Appointment non-attendance           | Reduction rate of non-attendance                                                                                                                                    | ↓               |
| <b>Arora et al. (2012) [32]</b>        | Effectiveness: Medication adherence  | MMAS (Morisky Medication Adherence Scale)                                                                                                                           | ↑               |
| <b>Balato et al (2012) [37]</b>        | Treatment adherence                  | A multiple-choice question,<br>7 day calendar of adherent days                                                                                                      | ↑               |
|                                        | Disease severity                     | PASI (Psoriasis Area Severity Index),<br>BSA (body surface area),<br>PGA (Physician Global Assessment),<br>SAPASI (Self-Administered Psoriasis Area Severity Index) | ↓               |
|                                        | Quality of life                      | DLQI (Dermatology Life Quality Index)                                                                                                                               | ↑               |
| <b>Boker et al (2012) [47]</b>         | Medication adherence                 | Self-reported adherence,<br>MEMS (Medication Event Monitoring System)                                                                                               | ↓               |
|                                        | Disease severity                     | Eg digital photographs,<br>Patient Global Assessment scale                                                                                                          | ↓               |
| <b>Bos et al (2005) [58]</b>           | Appointment attendance               | Attendance rate                                                                                                                                                     | ↔               |
| <b>Bourne et al (2011) [69]</b>        | Re-testing rate                      | Re-testing rate                                                                                                                                                     | ↑               |
| <b>Brannan et al (2011) [56]</b>       | Appointment non-attendance           | DNA (Did not attend) -rate                                                                                                                                          | ↓               |
| <b>Branson et al (2011) [70]</b>       | Appointment attendance               | Attendance rate                                                                                                                                                     | ↑               |
| <b>Chen et al (2008) [61]</b>          | Appointment attendance               | Attendance rate                                                                                                                                                     | ↑               |
| <b>da Costa et al (2010) [67]</b>      | Appointment non-attendance           | Non-attendance rate                                                                                                                                                 | ↓               |
| <b>da Costa et al (2012) [80]</b>      | Medication adherence                 | Self-report,<br>pill counting,<br>MEMS (Medication Event Monitoring System)                                                                                         | ↑               |
| <b>Dick et al (2011) [44]</b>          | Treatment adherence                  | Self-report: estimation of the number of medication doses missed                                                                                                    | ↑               |
| <b>Downer et al (2005) [59]</b>        | Failure to attend (FTA)              | FTA (Failure to attend) -rate                                                                                                                                       | ↓               |
| <b>Downing et al (2013) [77]</b>       | Re-testing                           | Re-testing rate                                                                                                                                                     | ↑               |
| <b>Dowshen et al (2012) [48]</b>       | Medication adherence                 | VAS (Visual analog scale), adherence questionnaire                                                                                                                  | ↑               |

|                                           |                                     |                                                                                                                        |     |
|-------------------------------------------|-------------------------------------|------------------------------------------------------------------------------------------------------------------------|-----|
| <b>Fairhurst &amp; Sheikh (2008) [62]</b> | Non-attendance                      | Non-attendance rate                                                                                                    | ↓   |
| <b>Fischer et al (2012) [73]</b>          | Appointment attendance              | Cancellation rate, no-show rate                                                                                        | ↔   |
| <b>Foley &amp; O'Neill (2009) [64]</b>    | Appointment non-attendance          | Appointment attendance analysis                                                                                        | ↓   |
| <b>Foreman et al (2012) [82]</b>          | Medication adherence                | PDC (Proportion of days covered)                                                                                       | ↑   |
| <b>Franklin et al (2006) [35]</b>         | Treatment adherence                 | Blood test (HbA1c),<br>VAS (Visual analog scale)                                                                       | ↑   |
|                                           | Self-efficacy                       | SED (self-efficacy for diabetes score),<br>DKN (diabetes knowledge score),<br>DSSI (diabetes social support interview) | ↑   |
| <b>Furberg et al (2012) [21]</b>          | Medication adherence                | Medication adherence question via two-way text message                                                                 | N/a |
| <b>Granholtm et al (2012) [49]</b>        | Medication adherence                | Daily ambulatory monitoring assessment                                                                                 | ↑   |
|                                           | Social interactions                 | Daily ambulatory monitoring assesment                                                                                  | ↑   |
|                                           | Severity of hallucinations          | Daily ambulatory monitoring assessment                                                                                 | ↓   |
| <b>Guy et al (2013) [78]</b>              | Re-screening                        | Re-screening rate                                                                                                      | ↑   |
| <b>Hanauer et al (2009) [36]</b>          | Blood glucose monitoring            | Reminder system usage                                                                                                  | ↑   |
| <b>Hardy et al (2011) [45]</b>            | Adherence to antiretroviral therapy | Self report,<br>pill count,<br>MEMS (Medication Event Monitoring System),<br>CAS (composite adherence score)           | ↑   |
| <b>Hou et al. (2010) [42]</b>             | Oral contraceptive pill adherence   | Electronic monitoring device, diary of pill taking                                                                     | ↔   |
| <b>Kollman et al (2007) [79]</b>          | Treatment adherence                 | Blood test                                                                                                             | ↑   |
| <b>Koshy et al (2008) [63]</b>            | Appointment non-attendance          | Non-attendance rate                                                                                                    | ↓   |
| <b>Leong et al (2006) [60]</b>            | Appointment attendance              | Attendance rate                                                                                                        | ↑   |
|                                           | Costs of text messages              | Cost-effectiveness analysis                                                                                            | ↓   |
| <b>Lewis et al (2013) [53]</b>            | Medication adherence                | Medication adherence question via two-way text message and survey                                                      | ↑   |
| <b>Liew et al (2009) [65]</b>             | Non-attendance                      | Non-attendance rate                                                                                                    | ↓   |
| <b>Ludlow et al (2009) [66]</b>           | Delays in blood monitoring          | Number of days of delays                                                                                               | ↓   |
| <b>Lund et al (2012) [34]</b>             | Skilled delivery attendance         | Patient register analysis                                                                                              | ↑   |
| <b>Lv et al (2012) [50]</b>               | Perceived control of asthma         | PCAQ-6 (six item perceived control of asthma questionnaire)                                                            | ↑   |

|                                         |                                       |                                                                                      |     |
|-----------------------------------------|---------------------------------------|--------------------------------------------------------------------------------------|-----|
|                                         | Quality of life                       | AQLQ(S) (Asthma-Specific Quality of Life)                                            | ↑   |
|                                         | Follow-up adherence                   | Follow-up adherence rate                                                             | ↑   |
|                                         | Medication compliance                 | Medication compliance rate                                                           | ↑   |
|                                         | Emergency department visits           | Emergency department visit data                                                      | ↓   |
| <b>Milne (2010) [68]</b>                | Appointment non-attendance            | DNA (Did not attend) -rate                                                           | ↓   |
| <b>Montes et al (2012) [51]</b>         | Medication adherence                  | MAQ (Morisky Green Adherence Questionnaire)                                          | ↑   |
|                                         | Severity of illness                   | CGI-SCH (Clinical Global Impression - Schizophrenia Scale)                           | ↓   |
|                                         | Attitude towards medication           | DAI-10 (Drug Attitude Inventory)                                                     | ↑   |
|                                         | Awareness of illness                  | SUMD (Scale to Assess Unawareness of Mental Disorder)                                | ↔   |
|                                         | Quality of life                       | EQ-5D (EuroQol)                                                                      | ↑   |
| <b>Nundy et al (2013) [54]</b>          | Organizing diabetes care              | Interviews                                                                           | ↑   |
|                                         | Self management                       | Interviews                                                                           | ↑   |
| <b>Nundy et al (2013) [20]</b>          | Maintenance and self-management       | SCHFI (The Self-Care of Heart Failure Index)                                         | ↑   |
| <b>Pena-Robichaux et al (2010) [31]</b> | Treatment adherence                   | 7-day recall calendar,<br>a multiple-choice question in a survey about the adherence | ↑   |
|                                         | Self care behavior                    | Structured questionnaire                                                             | ↑   |
|                                         | Skin severity                         | SCORAD (SCORing Atopic Dermatitis index)                                             | ↑   |
|                                         | Quality of life                       | DQLI (Quality of Life Index)                                                         | ↑   |
| <b>Perry (2011) [71]</b>                | Failed attendance                     | Failed attendance rate                                                               | ↓   |
| <b>Pijnenborg et al (2007) [30]</b>     | Medication compliance                 | Daily target achievement recording (percentage of goals achieved)                    | ↑/↓ |
|                                         | Attendance                            | Daily target achievement recording (percentage of goals achieved)                    | ↑/↓ |
| <b>Pijnenborg et al (2010) [83]</b>     | Achievement of goals                  | Percentage of goals achieved                                                         | ↑/↓ |
| <b>Pop-Eleches et al (2011) [46]</b>    | Adherence to antiretroviral treatment | MEMS (Medication event monitoring system )                                           | ↑   |
| <b>Prasad &amp; Anand (2012) [74]</b>   | Appointment attendace                 | Attendance rate                                                                      | ↑   |
| <b>Rodrigues et al (2012) [40]</b>      | Adherence to antiretroviral therapy   | Pill count                                                                           | ↑   |
| <b>Shaw et al (2013) [22]</b>           | Adherence to nutrition and exercise   | Self-report (weight)                                                                 | ↑   |
| <b>Sims et al (2012) [75]</b>           | Appointment attendace                 | Attendance rate                                                                      | ↑   |
| <b>Strandbygaard et al (2010) [43]</b>  | Treatment adherence                   | Adherence rate                                                                       | ↑   |
| <b>Taylor et al (2012) [76]</b>         | Appointment non-attendance            | Non-attendance rate                                                                  | ↓   |
| <b>Ting et al (2012) [52]</b>           | Appointment adherence                 | Attendance rate                                                                      | ↑   |

|                                   |                                 |                                                                                                   |   |
|-----------------------------------|---------------------------------|---------------------------------------------------------------------------------------------------|---|
|                                   | Medication adherence            | MASRI (Medication Adherence Self-Report Inventory),<br>blood test,<br>pharmacy refill information | ↔ |
| <b>Vervloet et al (2012) [81]</b> | Adherence to oral antidiabetics | RTMM (Real Time Medication Monitoring)                                                            | ↑ |
| <b>Vilella et al (2004) [57]</b>  | Compliance with vaccination     | Compliance rate                                                                                   | ↑ |

↑ Outcome increased or improved

↓ Outcome decreased

↔ No impact on the outcome

N/a=Not available
